# Supplementary material
Source: Springer Nature journal article supplement (https://www.springermedizin.de/resource/supplementary/12916_2009_257_MOESM2_ESM.pdf/9599504)
Supplement: MOESM2 [file 9599504]

**Study name****Statistics for each study****Std diff in means and 95% CI**

| <b>Std diff<br/>in means</b> | <b>Lower<br/>limit</b> | <b>Upper<br/>limit</b> | <b>Z-Value</b> | <b>p-Value</b> |
|------------------------------|------------------------|------------------------|----------------|----------------|
|------------------------------|------------------------|------------------------|----------------|----------------|

|                   |       |        |       |       |       |
|-------------------|-------|--------|-------|-------|-------|
| Christensen, 2004 | 0,310 | 0,079  | 0,541 | 2,631 | 0,009 |
| Geisner, 2006     | 0,070 | -0,225 | 0,365 | 0,465 | 0,642 |
| Kawakami, 1999    | 0,040 | -0,272 | 0,352 | 0,251 | 0,802 |
| Jacobs, 2002      | 0,606 | 0,019  | 1,193 | 2,022 | 0,043 |
|                   | 0,202 | 0,008  | 0,397 | 2,037 | 0,042 |

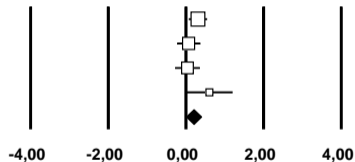**Favours control Favours psychoeducation**
